# Supplementary material for: Vibrational spectroscopy of protonated amine–water clusters: tuning Fermi resonance and lighting up dark states
Source: Royal Society of Chemistry journal article supplement (doi:10.1039/d0cp03229h), 2020-01-01
Supplement: d0cp03229h1.pdf [file d0cp03229h1.pdf]

# Vibrational spectroscopy of protonated amine–water clusters: Tuning Fermi resonance and lighting up dark states

Chih-Kai Lin,<sup>\*a</sup> Ryunosuke Shishido,<sup>b</sup> Qian-Rui Huang,<sup>a</sup> Asuka Fujii<sup>\*b</sup> and Jer-Lai Kuo<sup>\*a</sup>

<sup>a</sup> *Institute of Atomic and Molecular Sciences, Academia Sinica, Taipei 10617, Taiwan, ROC.*

<sup>b</sup> *Department of Chemistry, Graduate School of Science, Tohoku University, Sendai 980-8578, Japan.*

## Electronic Supplementary Information

The following information contains the procedure for calculating localized normal mode (LNM), the discussion on rotation-vibration couplings and simulated rotational profiles, calculated geometric parameters, harmonic vibrational frequencies, Hamiltonian matrices of vibrational quantum states, and other properties relevant to Fermi resonance of the simplest ammonium ion ( $\text{NH}_4^+$ ) and methylated ammonium ions (protonated amines, including  $\text{MA-H}^+$ ,  $\text{DMA-H}^+$  and  $\text{TMA-H}^+$ ), their hydrogen-bonded clusters with one water molecule, and their argon-tagged clusters.

## Procedure for calculating localized normal mode (LNM)

In many large molecular systems, the vibrational normal modes are delocalized over the whole molecule. If we are interested in specific characteristics of a fragment in the system, the interpretation using normal mode analysis becomes rather complicated – There will be many modes contributing to the vibrations of that fragment, and we have to include all of them which contain a large portion of motions concerning other parts of the system. However, in many cases, the IR spectra show the characteristics of that fragment only, indicating that there should be a better way than the conventional normal modes to present the vibrational properties.

A natural answer to the above situation is to constrain the vibrational modes into the target fragment. Many methods have been proposed for this purpose. For example, in the partial Hessian vibrational analysis (PHVA) proposed by Head, the partial Hessian matrix was diagonalized to obtain the vibrations for adsorbates on surfaces.<sup>1</sup> This method would be one of the simplest ways to constrain vibrational modes vectors into a specific region, and many researchers have applied PHVA to different systems.<sup>2,3</sup>

To differentiate the conventional normal mode and the projected vibrational mode, we used the term “global normal mode” (GNM) for the original normal mode analysis across the whole molecular system, and “localized normal mode” (LNM) utilizing the concept of PHVA. We divided the Hessian matrix into several sub-matrices corresponding to different fragments and diagonalized them individually, resulting in LNM as the eigenvector matrices. We then chose some of the vectors from LNM, scanned the reduced-dimensional PES, and performed anharmonic vibrational analysis using the DVR algorithm. Note that the vector space spanned by LNM coordinates is exactly the same as the calculation along GNM coordinates if all LNM/GNM are included. The major difference between the two approaches occurs when we disregard some modes in the reduced-dimensional vibrational analysis; the choice of LNM or GNM will result in different loss of the information about the exact PES. Clearly, it is non-trivial to determine which method is better in any specific case. Nevertheless, as we have found only negligible vibrational coupling between CH<sub>3</sub> and NH<sub>2</sub>/NH groups in neutral MA/DMA,<sup>4,5</sup> we believe that the current choice of LNM is good enough in this study.

## Rotation-vibration coupling and rotational profile in vibrational spectra

According to the characteristics of rotation-vibration coupling, the rotational profile of a vibrational transition can be seen when (i) there is a component of dipole derivative perpendicular to one rotational axis, and (ii) the rotational constant is not small (moment of inertia is not large) about that axis.

We have simulated the rotational profiles of these cluster systems using the PGOPHER program,<sup>6</sup> finding that the 3400 cm<sup>-1</sup> band of NH<sub>4</sub><sup>+</sup>...H<sub>2</sub>O shown in **Fig. 8(b)** would bear certain features attributed to the rotation-vibration coupling for free NH stretching modes. This mode satisfies criteria (i), and (ii) the corresponding rotational constant about the N–O axis is as large as 126 GHz. As the size of the amine moiety increases to CH<sub>3</sub>NH<sub>3</sub><sup>+</sup> (MA–H<sup>+</sup>), the bulky methyl group reduces the rotational constant to 24 GHz, and those fine structures almost disappear. The simulated

rotational profiles at different proposed temperatures are shown in **Fig. S1**. However, the current experimental resolution was not enough to resolve the rotational profile in either case.

For comparison, it is seen in Dopfer's work that the  $\text{NH}_4^+\dots\text{Ar}$  cluster did show a clear rotational profile.<sup>7</sup> The corresponding rotational constant is 180 GHz therein. All  $\text{NH}_4^+\dots\text{Rg}$  clusters have similar rotational constants about the N–Rg axis, and thus similar rotation-vibration coupling features are expected for their free NH stretching modes. Summarizing these findings, it is not the size of molecule/cluster alone that determines the effect of vibrational angular momentum, but the criteria (i) and (ii) mentioned above that decide its significance.

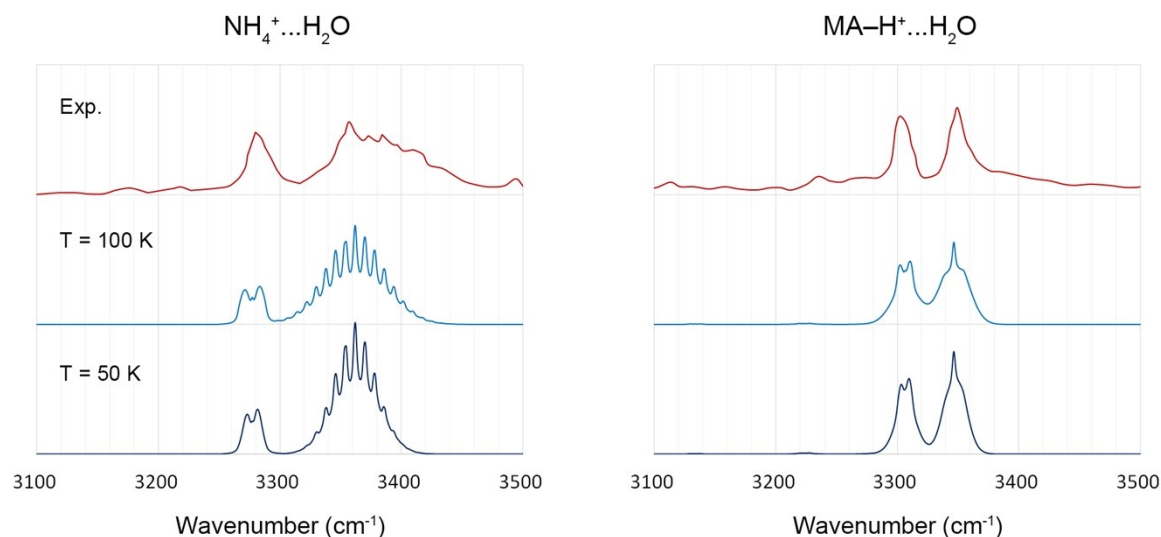

**Figure S1.** Simulated vibrational spectra with rotational profiles in the free NH stretching region of  $\text{NH}_4^+\dots\text{H}_2\text{O}$  and  $\text{MA-H}^+\dots\text{H}_2\text{O}$ . The experimental spectra (with Ar tagging and cooling) are shown for comparison.

## References

- <sup>1</sup> J. D. Head, *Int. J. Quantum Chem.*, 1997, **65**, 827–838.
- <sup>2</sup> H. Li and J. H. Jensen, *Theor. Chem. Acc.*, 2002, **107**, 211–219.
- <sup>3</sup> N. A. Besley and K. A. Metcalf, *J. Chem. Phys.*, 2007, **126**, 035101.
- <sup>4</sup> Q.-R. Huang, Y.-C. Li, K.-L. Ho and J.-L. Kuo, *Phys. Chem. Chem. Phys.*, 2018, **20**, 7653–7660.
- <sup>5</sup> B. Zhang, Q.-R. Huang, S. Jiang, L.-W. Chen, P.-J. Hsu, C. Wang, C. Hao, X. Kong, D. Dai, X. Yang, J.-L. Kuo and L. Jiang, *J. Chem. Phys.*, 2019, **150**, 064317.
- <sup>6</sup> PGOPHER, A Program for Simulating Rotational, Vibrational and Electronic Spectra, C. M. Western, University of Bristol, <http://pgopher.chm.bris.ac.uk>
- <sup>7</sup> O. Dopfer, S. A. Nizkorodov, M. Meuwly, E. J. Bieske and J. P. Maier, *Int. J. Mass Spectrom. Ion Proc.*, 1997, **167–168**, 637–647.

**Table S1.** Cartesian coordinates of bare ammonium ions and ammonium–water clusters optimized at the MP2/aug-cc-pVDZ level.

NH<sub>4</sub><sup>+</sup>

|   |             |             |             |
|---|-------------|-------------|-------------|
| N | 0.00000000  | 0.00000000  | 0.00000000  |
| H | -0.00000000 | -0.00000000 | 1.02802758  |
| H | -0.00000000 | -0.96923370 | -0.34267586 |
| H | -0.83938100 | 0.48461685  | -0.34267586 |
| H | 0.83938100  | 0.48461685  | -0.34267586 |

NH<sub>4</sub><sup>+</sup>...H<sub>2</sub>O

|   |             |             |             |
|---|-------------|-------------|-------------|
| N | 0.00001125  | -1.34562722 | 0.00000000  |
| H | -0.00291663 | -0.28771642 | 0.00000000  |
| H | -0.48126923 | -1.69952281 | 0.83256600  |
| H | -0.48126923 | -1.69952281 | -0.83256600 |
| H | 0.96400260  | -1.69306699 | 0.00000000  |
| O | 0.00152189  | 1.36252936  | 0.00000000  |
| H | -0.00540070 | 1.94949232  | -0.76968500 |
| H | -0.00540070 | 1.94949232  | 0.76968500  |

NH<sub>4</sub><sup>+</sup>...H<sub>2</sub>O...Ar (type 1)

|    |             |             |             |
|----|-------------|-------------|-------------|
| N  | -3.10534360 | -0.56825989 | 0.00000000  |
| H  | -2.24402878 | 0.04966401  | 0.00000000  |
| H  | -3.95280514 | 0.00763386  | 0.00000000  |
| H  | -3.11116951 | -1.16292084 | 0.83432800  |
| H  | -3.11116951 | -1.16292084 | -0.83432800 |
| O  | -0.91318354 | 0.99988929  | 0.00000000  |
| H  | -0.88130467 | 1.96705355  | 0.00000000  |
| H  | 0.01155044  | 0.70959874  | 0.00000000  |
| Ar | 2.35176671  | -0.24607797 | 0.00000000  |

Ar...NH<sub>4</sub><sup>+</sup>...H<sub>2</sub>O (type 2)

|   |            |             |             |
|---|------------|-------------|-------------|
| N | 0.95283989 | 1.18513924  | 0.00000000  |
| H | 1.70488899 | 0.44390451  | 0.00000000  |
| H | 1.04153662 | 1.77341105  | 0.83392900  |
| H | 0.02403586 | 0.74834207  | 0.00000000  |
| H | 1.04153662 | 1.77341105  | -0.83392900 |
| O | 2.88792265 | -0.72061710 | 0.00000000  |
| H | 3.84631888 | -0.58541737 | 0.00000000  |
| H | 2.76551313 | -1.68071029 | 0.00000000  |

|                                                    |             |             |             |
|----------------------------------------------------|-------------|-------------|-------------|
| Ar                                                 | -2.23317169 | -0.27799883 | 0.00000000  |
| MA-H <sup>+</sup>                                  |             |             |             |
| N                                                  | 0.00000000  | 0.00000000  | 0.70996389  |
| H                                                  | 0.00000000  | 0.95585690  | 1.08653789  |
| H                                                  | 0.82779636  | -0.47792845 | 1.08653789  |
| H                                                  | -0.82779636 | -0.47792845 | 1.08653789  |
| C                                                  | 0.00000000  | 0.00000000  | -0.80128311 |
| H                                                  | 0.90200503  | 0.52077284  | -1.14055411 |
| H                                                  | -0.90200503 | 0.52077284  | -1.14055411 |
| H                                                  | 0.00000000  | -1.04154569 | -1.14055411 |
| MA-H <sup>+</sup> ...H <sub>2</sub> O              |             |             |             |
| N                                                  | -0.68167544 | 0.67362437  | 0.00000000  |
| H                                                  | 0.33730608  | 0.42232717  | 0.00000000  |
| H                                                  | -0.86809300 | 1.25489240  | 0.82389900  |
| H                                                  | -0.86809300 | 1.25489240  | -0.82389900 |
| C                                                  | -1.53598156 | -0.56416168 | 0.00000000  |
| H                                                  | -1.29642947 | -1.14286315 | -0.89873000 |
| H                                                  | -1.29642947 | -1.14286315 | 0.89873000  |
| H                                                  | -2.59122864 | -0.27026469 | 0.00000000  |
| O                                                  | 1.94113114  | -0.14869611 | 0.00000000  |
| H                                                  | 2.52076790  | -0.25847630 | -0.76737500 |
| H                                                  | 2.52076790  | -0.25847630 | 0.76737500  |
| MA-H <sup>+</sup> ...H <sub>2</sub> O...Ar (type1) |             |             |             |
| N                                                  | 2.23691321  | -0.12902004 | 0.00000000  |
| H                                                  | 1.58600223  | 0.69519198  | 0.00000000  |
| H                                                  | 2.84101320  | -0.05930707 | -0.82556679 |
| H                                                  | 2.84101320  | -0.05930707 | 0.82556679  |
| C                                                  | 1.46345217  | -1.41843102 | 0.00000000  |
| H                                                  | 0.83834119  | -1.43999799 | 0.89942926  |
| H                                                  | 0.83834119  | -1.43999799 | -0.89942926 |
| H                                                  | 2.16739415  | -2.25766604 | 0.00000000  |
| O                                                  | 0.43698327  | 1.93512401  | 0.00000000  |
| H                                                  | 0.58480829  | 2.89147001  | 0.00000000  |
| H                                                  | -0.52432774 | 1.82401304  | 0.00000000  |
| Ar                                                 | -2.17264380 | -0.34564392 | 0.00000000  |

Ar...MA-H<sup>+</sup>...H<sub>2</sub>O (type 2)

|    |             |             |             |
|----|-------------|-------------|-------------|
| N  | 0.81190208  | 0.56984420  | 0.59375306  |
| H  | 1.53559111  | -0.15405278 | 0.36809707  |
| H  | -0.11164389 | 0.12341213  | 0.56664819  |
| H  | 0.96568314  | 0.88723230  | 1.55624102  |
| C  | 0.87927292  | 1.71410310  | -0.37827206 |
| H  | 1.87667990  | 2.16219818  | -0.31328619 |
| H  | 0.70744386  | 1.31522699  | -1.38403000 |
| H  | 0.10896690  | 2.44844208  | -0.11844606 |
| O  | 2.75537713  | -1.23998575 | -0.13981493 |
| H  | 2.63051414  | -2.06518081 | -0.62993283 |
| H  | 3.67819416  | -1.26115066 | 0.15121900  |
| Ar | -2.46629991 | -0.43387608 | -0.05359055 |

DMA-H<sup>+</sup>

|   |             |             |             |
|---|-------------|-------------|-------------|
| N | 0.00000000  | 0.00000000  | 0.54707770  |
| H | -0.81934300 | 0.00000000  | 1.16690170  |
| H | 0.81934300  | 0.00000000  | 1.16690170  |
| C | 0.00000000  | 1.25799800  | -0.27843930 |
| H | -0.90122500 | 1.25457300  | -0.90292130 |
| H | 0.00000000  | 2.12378500  | 0.39480470  |
| H | 0.90122500  | 1.25457300  | -0.90292130 |
| C | 0.00000000  | -1.25799800 | -0.27843930 |
| H | 0.00000000  | -2.12378500 | 0.39480470  |
| H | -0.90122500 | -1.25457300 | -0.90292130 |
| H | 0.90122500  | -1.25457300 | -0.90292130 |

DMA-H<sup>+</sup>...H<sub>2</sub>O

|   |             |             |             |
|---|-------------|-------------|-------------|
| N | 0.50380605  | 0.00661606  | -0.43578517 |
| H | -0.53534996 | -0.00839293 | -0.33150121 |
| H | 0.70280609  | 0.02268002  | -1.44199416 |
| C | 1.07069402  | -1.24578591 | 0.16020891  |
| H | 0.81292097  | -1.26104887 | 1.22624190  |
| H | 0.63339504  | -2.11201793 | -0.35109408 |
| H | 2.16012502  | -1.23743192 | 0.03365596  |
| C | 1.03738502  | 1.25530409  | 0.19781081  |
| H | 0.58537404  | 2.12475907  | -0.29470525 |
| H | 0.76669297  | 1.23790413  | 1.26039680  |
| H | 2.12780102  | 1.27421308  | 0.08132685  |
| O | -2.22525798 | -0.00879491 | 0.06107971  |

|   |             |             |             |
|---|-------------|-------------|-------------|
| H | -2.75200399 | -0.73946190 | 0.41505772  |
| H | -2.87481396 | 0.66573508  | -0.18364434 |

DMA-H<sup>+</sup>...H<sub>2</sub>O...Ar (type 1)

|    |             |             |             |
|----|-------------|-------------|-------------|
| N  | -1.67700309 | 0.06844853  | 0.00000000  |
| H  | -1.01141598 | 0.87410338  | 0.00000000  |
| H  | -2.62027519 | 0.47216563  | 0.00000000  |
| C  | -1.48578588 | -0.73191121 | 1.25226300  |
| H  | -0.46749556 | -1.13803695 | 1.24267700  |
| H  | -1.62392926 | -0.07284520 | 2.11776800  |
| H  | -2.22012012 | -1.54652023 | 1.26796500  |
| C  | -1.48578588 | -0.73191121 | -1.25226300 |
| H  | -1.62392926 | -0.07284520 | -2.11776800 |
| H  | -0.46749556 | -1.13803695 | -1.24267700 |
| H  | -2.22012012 | -1.54652023 | -1.26796500 |
| O  | 0.12262784  | 2.17987236  | 0.00000000  |
| H  | -0.05081570 | 3.13195235  | 0.00000000  |
| H  | 1.08684480  | 2.10027253  | 0.00000000  |
| Ar | 2.21145452  | -0.56660407 | 0.00000000  |

Ar...DMA-H<sup>+</sup>...H<sub>2</sub>O (type 2)

|    |             |             |             |
|----|-------------|-------------|-------------|
| N  | -0.64604209 | 0.21433302  | 0.01258612  |
| H  | -1.53011209 | -0.33741699 | -0.04090992 |
| H  | 0.13381792  | -0.44949796 | -0.04623995 |
| C  | -0.58849409 | 0.92013290  | 1.33194918  |
| H  | -1.45329410 | 1.59131288  | 1.39772726  |
| H  | -0.62481207 | 0.17443083  | 2.13544712  |
| H  | 0.34533390  | 1.49294592  | 1.38495322  |
| C  | -0.57729513 | 1.14640613  | -1.15719280 |
| H  | -0.61868013 | 0.55859422  | -2.08237585 |
| H  | -1.43266514 | 1.83070211  | -1.10010072 |
| H  | 0.36260687  | 1.70923914  | -1.10469776 |
| O  | -3.10820207 | -1.07274101 | -0.08070197 |
| H  | -3.43229805 | -1.77393207 | 0.50234297  |
| H  | -3.78503508 | -0.99307496 | -0.76774395 |
| Ar | 2.68987692  | -0.50671892 | -0.04274599 |

TMA-H<sup>+</sup>

|   |            |            |            |
|---|------------|------------|------------|
| N | 0.00000000 | 0.00000000 | 0.34833471 |
|---|------------|------------|------------|

|   |             |             |             |
|---|-------------|-------------|-------------|
| H | 0.00000000  | 0.00000000  | 1.37644971  |
| C | 0.00000000  | 1.43229675  | -0.10485722 |
| H | -0.90147400 | 1.92509873  | 0.28008880  |
| H | 0.90147400  | 1.92509873  | 0.28008880  |
| H | 0.00000000  | 1.43807680  | -1.20263122 |
| C | -1.24040537 | -0.71614837 | -0.10485722 |
| H | -1.21644740 | -1.74324875 | 0.28008880  |
| H | -2.11792140 | -0.18184998 | 0.28008880  |
| H | -1.24541104 | -0.71903840 | -1.20263122 |
| C | 1.24040537  | -0.71614837 | -0.10485722 |
| H | 2.11792140  | -0.18184998 | 0.28008880  |
| H | 1.21644740  | -1.74324875 | 0.28008880  |
| H | 1.24541104  | -0.71903840 | -1.20263122 |

TMA-H<sup>+</sup>...H<sub>2</sub>O

|   |             |             |             |
|---|-------------|-------------|-------------|
| N | -0.37803599 | -0.00343359 | 0.00000000  |
| H | 0.66369784  | -0.02396082 | 0.00000000  |
| C | -0.84588481 | -0.70460013 | 1.23633000  |
| H | -0.48760839 | -1.74149309 | 1.21220700  |
| H | -0.43920576 | -0.18412472 | 2.11243600  |
| H | -1.94376779 | -0.68349309 | 1.25579800  |
| C | -0.84588481 | -0.70460013 | -1.23633000 |
| H | -0.43920576 | -0.18412472 | -2.11243600 |
| H | -0.48760839 | -1.74149309 | -1.21220700 |
| H | -1.94376779 | -0.68349309 | -1.25579800 |
| C | -0.79780839 | 1.43277225  | 0.00000000  |
| H | -0.39988722 | 1.91733151  | 0.90071700  |
| H | -0.39988722 | 1.91733151  | -0.90071700 |
| H | -1.89521805 | 1.47634531  | 0.00000000  |
| O | 2.41727367  | -0.01869610 | 0.00000000  |
| H | 3.00850539  | 0.74742628  | 0.00000000  |
| H | 3.00948382  | -0.78408000 | 0.00000000  |

TMA-H<sup>+</sup>...H<sub>2</sub>O...Ar

|   |             |             |            |
|---|-------------|-------------|------------|
| N | -0.17023941 | 1.26152844  | 0.00000000 |
| H | 0.66169570  | 0.63384174  | 0.00000000 |
| C | -0.96241817 | 0.97489975  | 1.23637600 |
| H | -1.29569147 | -0.06958557 | 1.20740700 |



|    |             |             |             |
|----|-------------|-------------|-------------|
| H  | -0.32308826 | 1.14451134  | 2.11182400  |
| H  | -1.82854978 | 1.64986414  | 1.26043500  |
| C  | -0.96241817 | 0.97489975  | -1.23637600 |
| H  | -0.32308826 | 1.14451134  | -2.11182400 |
| H  | -1.29569147 | -0.06958557 | -1.20740700 |
| H  | -1.82854978 | 1.64986414  | -1.26043500 |
| C  | 0.34329475  | 2.66697229  | 0.00000000  |
| H  | 0.95151829  | 2.82057580  | 0.90031200  |
| H  | 0.95151829  | 2.82057580  | -0.90031200 |
| H  | -0.51425237 | 3.35310713  | 0.00000000  |
| O  | 2.13423204  | -0.31229917 | 0.00000000  |
| H  | 3.05990070  | -0.03035380 | 0.00000000  |
| H  | 2.16917816  | -1.27924532 | 0.00000000  |
| Ar | -0.37654615 | -2.65561209 | 0.00000000  |

**Table S2.** Selected geometric parameters related to NH and OH bonds of bare ammonium ions and ammonium–water clusters optimized at the MP2/aug-cc-pVDZ level.

| <b>Ammonium ion</b>                          | NH <sub>4</sub> <sup>+</sup>                          | MA–H <sup>+</sup>                          | DMA–H <sup>+</sup>                          | TMA–H <sup>+</sup>                          |
|----------------------------------------------|-------------------------------------------------------|--------------------------------------------|---------------------------------------------|---------------------------------------------|
| Free NH bond length (Å) <sup>a</sup>         | 1.027                                                 | 1.027                                      | 1.027                                       | 1.028                                       |
| NC bond length (Å)                           | –                                                     | 1.511                                      | 1.505                                       | 1.502                                       |
| <b>Ammonium–water cluster</b>                | NH <sub>4</sub> <sup>+</sup> ...H <sub>2</sub> O      | MA–H <sup>+</sup> ...H <sub>2</sub> O      | DMA–H <sup>+</sup> ...H <sub>2</sub> O      | TMA–H <sup>+</sup> ...H <sub>2</sub> O      |
| Free NH bond length (Å) <sup>a</sup>         | 1.025                                                 | 1.025                                      | 1.026                                       | –                                           |
| H-bonded NH bond length (Å)                  | 1.058                                                 | 1.050                                      | 1.044                                       | 1.042                                       |
| NC bond length (Å)                           | –                                                     | 1.504                                      | 1.498                                       | 1.496                                       |
| NH...O distance (Å)                          | 1.650                                                 | 1.702                                      | 1.735                                       | 1.753                                       |
| OH bond length (Å)                           | 0.968                                                 | 0.968                                      | 0.968                                       | 0.968                                       |
| NH...O angle (°)                             | 179.7                                                 | 174.2                                      | 172.6                                       | 178.7                                       |
| <b>Ammonium–water–argon cluster (type 1)</b> | NH <sub>4</sub> <sup>+</sup> ...H <sub>2</sub> O...Ar | MA–H <sup>+</sup> ...H <sub>2</sub> O...Ar | DMA–H <sup>+</sup> ...H <sub>2</sub> O...Ar | TMA–H <sup>+</sup> ...H <sub>2</sub> O...Ar |
| Free NH bond length (Å) <sup>a</sup>         | 1.025                                                 | 1.025                                      | 1.026                                       | –                                           |
| H-bonded NH bond length (Å)                  | 1.060                                                 | 1.050                                      | 1.045                                       | 1.042                                       |
| NC bond length (Å)                           | –                                                     | 1.504                                      | 1.498                                       | 1.496                                       |
| NH...O distance (Å)                          | 1.636                                                 | 1.690                                      | 1.729                                       | 1.750                                       |
| OH bond length (Å)                           | 0.968, 0.969 <sup>b</sup>                             | 0.968                                      | 0.968                                       | 0.968                                       |
| OH...Ar distance (Å)                         | 2.528                                                 | 2.725                                      | 2.894                                       | 2.894                                       |
| NH...O angle (°)                             | 179.8                                                 | 175.5                                      | 178.6                                       | 175.7                                       |
| OH...Ar angle (°)                            | 175.4                                                 | 133.8                                      | 117.6                                       | 116.3                                       |
| <b>Argon–ammonium–water cluster (type 2)</b> | Ar...NH <sub>4</sub> <sup>+</sup> ...H <sub>2</sub> O | Ar...MA–H <sup>+</sup> ...H <sub>2</sub> O | Ar...DMA–H <sup>+</sup> ...H <sub>2</sub> O | Ar...TMA–H <sup>+</sup> ...H <sub>2</sub> O |
| Free NH bond length (Å)                      | 1.024, 1.026 <sup>b</sup>                             | 1.025, 1.026 <sup>b</sup>                  | 1.026                                       | –                                           |
| H-bonded NH bond length (Å)                  | 1.056                                                 | 1.048                                      | 1.043                                       | –                                           |
| NC bond length (Å)                           | –                                                     | 1.503                                      | 1.497                                       | –                                           |
| NH...O distance (Å)                          | 1.660                                                 | 1.710                                      | 1.741                                       | –                                           |
| OH bond length (Å)                           | 0.968                                                 | 0.968                                      | 0.968                                       | –                                           |
| NH...Ar distance (Å)                         | 2.480                                                 | 2.498                                      | 2.557                                       | –                                           |
| NH...O angle (°)                             | 180.0                                                 | 174.2                                      | 172.8                                       | –                                           |
| NH...Ar angle (°)                            | 179.3                                                 | 162.2                                      | 140.8                                       | –                                           |

<sup>a</sup> All free NH bonds in each species have the same value of bond length to the third decimal place.

<sup>b</sup> The bond pointing toward Ar is slightly elongated.

**Table S3.** Selected harmonic vibrational frequencies (in  $\text{cm}^{-1}$ ) related to NH and OH vibrational modes of bare ammonium ions and ammonium–water clusters calculated at the MP2/aug-cc-pVDZ level.<sup>a</sup>

| <b>Ammonium ion</b> <sup>b</sup> | $\text{NH}_4^+$                          | $\text{MA-H}^+$                          | $\text{DMA-H}^+$                          | $\text{TMA-H}^+$                          |
|----------------------------------|------------------------------------------|------------------------------------------|-------------------------------------------|-------------------------------------------|
| Free NH stretching               | 3391 (t)                                 | 3376 (d)                                 | 3358                                      | 3305                                      |
|                                  | 3242                                     | 3272                                     | 3295                                      |                                           |
| $\text{NH}_2$ bending            | 1649 (d)                                 | 1595 (d)                                 | 1586                                      | 1361 (d) <sup>c</sup>                     |
|                                  |                                          | 1227 (d)                                 | 1357                                      |                                           |
|                                  |                                          |                                          | 1334                                      |                                           |
|                                  |                                          |                                          | 1221                                      |                                           |
| $\text{NH}_3$ umbrella           | 1401 (t)                                 | 1455                                     | –                                         | –                                         |
| <b>Ammonium–water cluster</b>    | $\text{NH}_4^+ \dots \text{H}_2\text{O}$ | $\text{MA-H}^+ \dots \text{H}_2\text{O}$ | $\text{DMA-H}^+ \dots \text{H}_2\text{O}$ | $\text{TMA-H}^+ \dots \text{H}_2\text{O}$ |
| Free NH stretching               | 3420                                     | 3395                                     | 3343                                      | –                                         |
|                                  | 3418                                     | 3329                                     |                                           |                                           |
|                                  | 3307                                     |                                          |                                           |                                           |
| H-bonded NH stretching           | 2819                                     | 2949                                     | 3027                                      | 3060                                      |
| $\text{NH}_2$ bending            | 1683                                     | 1646                                     | 1610                                      | 1484 <sup>c</sup>                         |
|                                  | 1659                                     | 1606                                     | 1474                                      | 1455 <sup>c</sup>                         |
|                                  |                                          | 1241                                     | 1355                                      |                                           |
|                                  |                                          | 1233                                     | 1226                                      |                                           |
| $\text{NH}_3$ umbrella           | 1460                                     | 1480                                     | –                                         | –                                         |
|                                  | 1434                                     |                                          |                                           |                                           |
|                                  | 1359                                     |                                          |                                           |                                           |
| OH stretching                    | 3734                                     | 3735                                     | 3736                                      | 3737                                      |
|                                  | 3623                                     | 3624                                     | 3624                                      | 3624                                      |
| $\text{OH}_2$ bending            | 1573                                     | 1570                                     | 1570                                      | 1572                                      |

**Table S3** (continued)

| <b>Ammonium–water–argon cluster (type 1)</b> | $\text{NH}_4^+ \dots \text{H}_2\text{O} \dots \text{Ar}$ | $\text{MA-H}^+ \dots \text{H}_2\text{O} \dots \text{Ar}$ | $\text{DMA-H}^+ \dots \text{H}_2\text{O} \dots \text{Ar}$ | $\text{TMA-H}^+ \dots \text{H}_2\text{O} \dots \text{Ar}$ |
|----------------------------------------------|----------------------------------------------------------|----------------------------------------------------------|-----------------------------------------------------------|-----------------------------------------------------------|
| Free NH stretching                           | 3421                                                     | 3398                                                     | 3340                                                      | –                                                         |
|                                              | 3419                                                     | 3329                                                     |                                                           |                                                           |
|                                              | 3307                                                     |                                                          |                                                           |                                                           |
| H-bonded NH stretching                       | 2786                                                     | 2937                                                     | 3020                                                      | 3058                                                      |
| NH <sub>2</sub> bending                      | 1684                                                     | 1614                                                     | 1631                                                      | 1479 <sup>c</sup>                                         |
|                                              | 1659                                                     | 1612                                                     | 1449                                                      | 1455 <sup>c</sup>                                         |
|                                              |                                                          | 1241                                                     | 1352                                                      |                                                           |
|                                              |                                                          | 1239                                                     | 1227                                                      |                                                           |
| NH <sub>3</sub> umbrella                     | 1462                                                     | 1502                                                     | –                                                         | –                                                         |
|                                              | 1435                                                     |                                                          |                                                           |                                                           |
|                                              | 1357                                                     |                                                          |                                                           |                                                           |
| -----                                        |                                                          |                                                          |                                                           |                                                           |
| OH stretching                                | 3724                                                     | 3738                                                     | 3739                                                      | 3739                                                      |
|                                              | 3612                                                     | 3624                                                     | 3625                                                      | 3625                                                      |
| OH <sub>2</sub> bending                      | 1573                                                     | 1565                                                     | 1566                                                      | 1570                                                      |
| -----                                        |                                                          |                                                          |                                                           |                                                           |
| <b>Argon–ammonium–water cluster (type 2)</b> | $\text{Ar} \dots \text{NH}_4^+ \dots \text{H}_2\text{O}$ | $\text{Ar} \dots \text{MA-H}^+ \dots \text{H}_2\text{O}$ | $\text{Ar} \dots \text{DMA-H}^+ \dots \text{H}_2\text{O}$ | $\text{Ar} \dots \text{TMA-H}^+ \dots \text{H}_2\text{O}$ |
| Free NH stretching                           | 3422                                                     | 3391                                                     | 3343                                                      | –                                                         |
|                                              | 3401                                                     | 3323                                                     |                                                           |                                                           |
|                                              | 3299                                                     |                                                          |                                                           |                                                           |
| H-bonded NH stretching                       | 2848                                                     | 2968                                                     | 3040                                                      | –                                                         |
| NH <sub>2</sub> bending                      | 1687                                                     | 1645                                                     | 1607                                                      | –                                                         |
|                                              | 1666                                                     | 1608                                                     | 1471                                                      |                                                           |
|                                              |                                                          | 1243                                                     | 1362                                                      |                                                           |
|                                              |                                                          | 1236                                                     | 1227                                                      |                                                           |
| NH <sub>3</sub> umbrella                     | 1455                                                     | 1480                                                     | –                                                         | –                                                         |
|                                              | 1439                                                     |                                                          |                                                           |                                                           |
|                                              | 1366                                                     |                                                          |                                                           |                                                           |
| -----                                        |                                                          |                                                          |                                                           |                                                           |
| OH stretching                                | 3736                                                     | 3736                                                     | 3737                                                      | –                                                         |
|                                              | 3624                                                     | 3624                                                     | 3625                                                      |                                                           |
| OH <sub>2</sub> bending                      | 1573                                                     | 1570                                                     | 1569                                                      | –                                                         |

<sup>a</sup> Frequency scaled by 0.959; only modes most relevant to NH/OH vibrations above 1000 cm<sup>-1</sup> are listed.

<sup>b</sup> (d) and (t) denote doubly and triply degenerate, respectively.

<sup>c</sup> C–N–H bending mode.

**Table S4.** Hamiltonian matrix elements (in  $\text{cm}^{-1}$ ) between NH bending overtones and stretching fundamentals involved in Fermi resonance and original IR intensities of vibrational quantum states (in  $\text{km/mol}$ ) in TMA– $\text{H}^+$  ion and clusters.<sup>a</sup>

**(a) TMA– $\text{H}^+$**

|      | Bending overtones |               |               | Str. fund     | Original |
|------|-------------------|---------------|---------------|---------------|----------|
|      | bb / bb' / b'b'   |               |               | s             | IR int.  |
| bb/  | <b>2807.3</b>     | 0.0           | 0.0           | 0.0           | 0.5      |
| bb'/ | 0.0               | <b>2813.9</b> | 0.0           | 0.1           | 0.5      |
| b'b' | 0.0               | 0.0           | <b>2830.2</b> | 137.0         | 0.0      |
| s    | 0.0               | 0.1           | <b>137.0</b>  | <b>3253.0</b> | 64.6     |

**(b) TMA– $\text{H}^+$ ... $\text{H}_2\text{O}$**

|          | Bending overtones |               |               | Str. fund     | Original |
|----------|-------------------|---------------|---------------|---------------|----------|
|          | $b_2b_2$          | $b_1b_2$      | $b_1b_1$      | s             | IR int.  |
| $b_2b_2$ | <b>2965.9</b>     | 0.0           | 0.9           | 74.8          | 0.3      |
| $b_1b_2$ | 0.0               | <b>3000.3</b> | 0.0           | 0.0           | 0.4      |
| $b_1b_1$ | 0.9               | 0.0           | <b>3052.2</b> | 89.7          | 0.2      |
| s        | <b>74.8</b>       | 0.0           | <b>89.7</b>   | <b>3018.8</b> | 885.8    |

**(c) TMA– $\text{H}^+$ ... $\text{H}_2\text{O}$ ...Ar**

|          | Bending overtones |               |               | Str. fund     | Original |
|----------|-------------------|---------------|---------------|---------------|----------|
|          | $b_2b_2$          | $b_1b_2$      | $b_1b_1$      | s             | IR int.  |
| $b_2b_2$ | <b>2966.6</b>     | 0.0           | 0.9           | -73.6         | 0.3      |
| $b_1b_2$ | 0.0               | <b>2994.7</b> | 0.0           | 0.0           | 0.3      |
| $b_1b_1$ | 0.9               | 0.0           | <b>3040.5</b> | -89.7         | 0.1      |
| s        | <b>-73.6</b>      | 0.0           | <b>-89.7</b>  | <b>3016.0</b> | 849.5    |

<sup>a</sup> Notations for NH vibrational modes: b: C–N–H bending, s: N–H stretching; see **Fig. 3**.

**Table S5.** Hamiltonian matrix elements (in  $\text{cm}^{-1}$ ) between NH bending overtones and stretching fundamentals involved in Fermi resonance and original IR intensities of vibrational quantum states (in  $\text{km/mol}$ ) in  $\text{DMA-H}^+$  ion and clusters.<sup>a</sup>

**(a) DMA-H<sup>+</sup>**

|                   | Bending overtones |               |               |               |               |               |               |               | Stretch. fund.   |                   | Original |
|-------------------|-------------------|---------------|---------------|---------------|---------------|---------------|---------------|---------------|------------------|-------------------|----------|
|                   | rw                | tt            | tw            | ww            | rx            | tx            | wx            | xx            | S <sub>sym</sub> | S <sub>anti</sub> | IR int.  |
| rw                | <b>2736.7</b>     | 0.0           | 0.0           | 0.0           | 0.0           | 3.6           | 0.0           | 0.0           | 0.0              | 0.0               | 0.0      |
| tt                | 0.0               | <b>2816.2</b> | 0.0           | -1.0          | 0.0           | 0.0           | 0.0           | -1.0          | -45.4            | 0.0               | 0.0      |
| tw                | 0.0               | 0.0           | <b>2868.0</b> | 0.0           | 3.7           | 0.0           | 0.0           | 0.0           | 0.0              | 77.0              | 0.1      |
| ww                | 0.0               | -1.0          | 0.0           | <b>2917.1</b> | 0.0           | 0.0           | 0.0           | -0.6          | 69.1             | 0.0               | 0.1      |
| rx                | 0.0               | 0.0           | 3.7           | 0.0           | <b>2931.0</b> | 0.0           | 0.0           | 0.0           | 0.0              | 53.7              | 0.0      |
| tx                | 3.6               | 0.0           | 0.0           | 0.0           | 0.0           | <b>3045.4</b> | 0.0           | 0.0           | 0.0              | 0.0               | 0.0      |
| wx                | 0.0               | 0.0           | 0.0           | 0.0           | 0.0           | 0.0           | <b>3092.7</b> | 0.0           | 0.0              | 0.0               | 0.5      |
| xx                | 0.0               | -1.0          | 0.0           | -0.6          | 0.0           | 0.0           | 0.0           | <b>3280.2</b> | -24.8            | 0.0               | 0.2      |
| S <sub>sym</sub>  | 0.0               | -45.4         | 0.0           | 69.1          | 0.0           | 0.0           | 0.0           | -24.8         | <b>3239.8</b>    | 0.0               | 64.7     |
| S <sub>anti</sub> | 0.0               | 0.0           | 77.0          | 0.0           | 53.7          | 0.0           | 0.0           | 0.0           | 0.0              | <b>3284.9</b>     | 95.4     |

**(b) DMA-H<sup>+</sup>...H<sub>2</sub>O**

|                | Bending overtones |               |               |               |               |               |               |               | Stretch. fund. |                | Original |
|----------------|-------------------|---------------|---------------|---------------|---------------|---------------|---------------|---------------|----------------|----------------|----------|
|                | rw                | tt            | rx            | tw            | ww            | tx            | wx            | xx            | S <sub>b</sub> | S <sub>f</sub> | IR int.  |
| rw             | <b>2824.4</b>     | 0.0           | -4.0          | -0.3          | 1.1           | -1.7          | 10.6          | 0.4           | -1.8           | 4.3            | 0.0      |
| tt             | 0.0               | <b>2885.5</b> | -2.5          | 0.7           | -0.3          | 1.6           | -0.3          | 1.0           | -9.9           | -71.6          | 0.1      |
| rx             | -4.0              | -2.5          | <b>2951.8</b> | 1.6           | -2.3          | 0.6           | -1.4          | -11.9         | -36.6          | 42.1           | 0.0      |
| tw             | -0.3              | 0.7           | 1.6           | <b>2976.3</b> | -1.8          | 4.7           | -1.4          | 0.8           | -13.8          | 35.6           | 0.0      |
| ww             | 1.1               | -0.3          | -2.3          | -1.8          | <b>3084.9</b> | -0.2          | 7.5           | -0.1          | 71.0           | 4.7            | 0.1      |
| tx             | -1.7              | 1.6           | 0.6           | 4.7           | -0.2          | <b>3093.5</b> | -0.7          | -1.7          | -2.5           | 2.2            | 0.1      |
| wx             | 10.6              | -0.3          | -1.4          | -1.4          | 7.5           | -0.7          | <b>3195.3</b> | 6.8           | 10.2           | -2.9           | 0.3      |
| xx             | 0.4               | 1.0           | -11.9         | 0.8           | -0.1          | -1.7          | 6.8           | <b>3315.4</b> | 18.4           | 9.6            | 0.5      |
| S <sub>b</sub> | -1.8              | -9.9          | -36.6         | -13.8         | 71.0          | -2.5          | 10.2          | 18.4          | <b>2954.4</b>  | 3.0            | 967.9    |
| S <sub>f</sub> | 4.3               | -71.6         | 42.1          | 35.6          | 4.7           | 2.2           | -2.9          | 9.6           | 3.0            | <b>3280.5</b>  | 72.9     |

Table S5. (continued)

(c) DMA–H<sup>+</sup>...H<sub>2</sub>O...Ar (type 1)

|                | Bending overtones |               |               |               |               |               |               |               | Stretch. fund. |                | Original |
|----------------|-------------------|---------------|---------------|---------------|---------------|---------------|---------------|---------------|----------------|----------------|----------|
|                | rw                | tt            | rx            | tw            | ww            | tx            | wx            | xx            | s <sub>b</sub> | s <sub>f</sub> | IR int.  |
| rw             | <b>2835.9</b>     | 0.0           | 0.0           | 0.0           | 0.0           | 2.4           | -11.9         | 0.0           | 0.0            | 0.0            | 0.0      |
| tt             | 0.0               | <b>2885.0</b> | 1.9           | 1.2           | 0.6           | 0.0           | 0.0           | -1.3          | 12.1           | 63.6           | 0.1      |
| rx             | 0.0               | 1.9           | <b>2956.6</b> | 2.5           | -2.3          | 0.0           | 0.0           | -14.2         | -40.7          | 41.8           | 0.0      |
| tw             | 0.0               | 1.2           | 2.5           | <b>2972.3</b> | -0.3          | 0.0           | 0.0           | 0.4           | -19.9          | 46.8           | 0.0      |
| ww             | 0.0               | 0.6           | -2.3          | -0.3          | <b>3056.9</b> | 0.0           | 0.0           | 0.1           | 62.1           | 12.0           | 0.0      |
| tx             | 2.4               | 0.0           | 0.0           | 0.0           | 0.0           | <b>3097.5</b> | 0.2           | 0.0           | 0.0            | 0.0            | 0.1      |
| wx             | -11.9             | 0.0           | 0.0           | 0.0           | 0.0           | 0.2           | <b>3195.6</b> | 0.0           | 0.0            | 0.0            | 0.4      |
| xx             | 0.0               | -1.3          | -14.2         | 0.4           | 0.1           | 0.0           | 0.0           | <b>3323.7</b> | 24.1           | 7.1            | 0.4      |
| s <sub>b</sub> | 0.0               | 12.1          | -40.7         | -19.9         | 62.1          | 0.0           | 0.0           | 24.1          | <b>2937.7</b>  | 2.9            | 967.0    |
| s <sub>f</sub> | 0.0               | 63.6          | 41.8          | 46.8          | 12.0          | 0.0           | 0.0           | 7.1           | 2.9            | <b>3280.9</b>  | 72.4     |

(d) Ar...DMA–H<sup>+</sup>...H<sub>2</sub>O (type 2)

|                | Bending overtones |               |               |               |               |               |               |               | Stretch. fund. |                | Original |
|----------------|-------------------|---------------|---------------|---------------|---------------|---------------|---------------|---------------|----------------|----------------|----------|
|                | rw                | tt            | rx            | tw            | ww            | tx            | wx            | xx            | s <sub>b</sub> | s <sub>f</sub> | IR int.  |
| rw             | <b>2823.9</b>     | -0.1          | -4.4          | -0.3          | 1.2           | 1.8           | -9.9          | -0.5          | -2.1           | 5.0            | 0.0      |
| tt             | -0.1              | <b>2899.7</b> | -2.5          | 0.6           | -0.4          | -1.8          | 0.3           | -1.0          | -9.9           | -71.4          | 0.1      |
| rx             | -4.4              | -2.5          | <b>2952.8</b> | 1.8           | -2.3          | -0.7          | 1.6           | 11.0          | -37.6          | 42.6           | 0.0      |
| tw             | -0.3              | 0.6           | 1.8           | <b>2980.8</b> | -1.8          | -5.2          | 1.6           | -0.8          | -14.9          | 37.6           | 0.0      |
| ww             | 1.2               | -0.4          | -2.3          | -1.8          | <b>3079.2</b> | 0.2           | -8.2          | 0.0           | 70.7           | 6.0            | 0.1      |
| tx             | 1.8               | -1.8          | -0.7          | -5.2          | 0.2           | <b>3099.4</b> | -0.7          | -1.9          | 3.0            | -2.5           | 0.1      |
| wx             | -9.9              | 0.3           | 1.6           | 1.6           | -8.2          | -0.7          | <b>3191.0</b> | 7.5           | -11.3          | 3.2            | 0.3      |
| xx             | -0.5              | -1.0          | 11.0          | -0.8          | 0.0           | -1.9          | 7.5           | <b>3312.3</b> | -20.1          | -9.5           | 0.5      |
| s <sub>b</sub> | -2.1              | -9.9          | -37.6         | -14.9         | 70.7          | 3.0           | -11.3         | -20.1         | <b>2972.9</b>  | 3.2            | 962.2    |
| s <sub>f</sub> | 5.0               | -71.4         | 42.6          | 37.6          | 6.0           | -2.5          | 3.2           | -9.5          | 3.2            | <b>3290.9</b>  | 136.2    |

<sup>a</sup> Notations for NH vibrational modes: r: rocking, t: twisting, w: wagging, x: scissoring, s<sub>b</sub>: H-bonded stretching, s<sub>f</sub>: free stretching; see Fig. 5. “rw” means one vibrational quantum in rocking and one in wagging; “tt” means two vibrational quanta in twisting mode.

**Table S6.** Hamiltonian matrix elements (in  $\text{cm}^{-1}$ ) between NH bending overtones and stretching fundamentals involved in Fermi resonance and original IR intensities of vibrational quantum states (in  $\text{km/mol}$ ) in  $\text{MA-H}^+$  ion and clusters.<sup>a</sup>

**(a)  $\text{MA-H}^+$**

|                    | Bending overtones |               |               |               |               |               | Stretching fundamentals |               |               |               |               |               | Original         |                   |                    |         |
|--------------------|-------------------|---------------|---------------|---------------|---------------|---------------|-------------------------|---------------|---------------|---------------|---------------|---------------|------------------|-------------------|--------------------|---------|
|                    | wu                | tu            | tx'           | wx            | wx            | tx            | uu                      | ux'           | ux            | x'x'          | x'x           | xx            | $S_{\text{sym}}$ | $S_{\text{asym}}$ | $S'_{\text{asym}}$ | IR int. |
| wu                 | <b>2821.2</b>     | 0.0           | 0.0           | 0.3           | 0.0           | -0.4          | -0.1                    | 3.6           | 2.6           | 0.0           | 0.0           | 0.1           | 0.2              | 45.3              | 26.7               | 0.0     |
| tu                 | 0.0               | <b>2821.3</b> | 0.3           | -0.1          | 0.2           | -0.1          | 0.0                     | -2.6          | 3.6           | 0.0           | 0.1           | 0.0           | 0.0              | 26.7              | -44.8              | 0.0     |
| tx'                | 0.0               | 0.3           | <b>2914.0</b> | 0.0           | 0.0           | 0.1           | 0.0                     | 0.0           | 0.0           | 0.5           | -0.2          | -0.1          | -0.5             | 1.3               | -1.7               | 0.0     |
| wx                 | 0.3               | -0.1          | 0.0           | <b>2914.2</b> | 0.0           | 0.0           | 0.5                     | 0.1           | 0.0           | -5.7          | 0.1           | -0.2          | 5.8              | 1.9               | 1.2                | 0.1     |
| wx                 | 0.0               | 0.2           | 0.0           | 0.0           | <b>2916.0</b> | 0.0           | 0.0                     | -0.2          | 0.2           | -0.1          | -5.8          | -1.2          | 0.1              | 18.8              | -43.8              | 0.0     |
| tx                 | -0.4              | -0.1          | 0.1           | 0.0           | 0.0           | <b>2916.0</b> | 0.0                     | -0.1          | -0.2          | -0.2          | -1.2          | 5.7           | 0.3              | -44.3             | -18.8              | 0.0     |
| uu                 | -0.1              | 0.0           | 0.0           | 0.5           | 0.0           | 0.0           | <b>3055.9</b>           | 0.1           | -0.1          | -0.5          | 0.0           | 0.0           | -48.1            | 0.0               | 0.2                | 0.1     |
| ux'                | 3.6               | -2.6          | 0.0           | 0.1           | -0.2          | -0.1          | 0.1                     | <b>3152.5</b> | 0.1           | -0.2          | -0.5          | 0.2           | -0.2             | 5.7               | 12.3               | 0.2     |
| ux                 | 2.6               | 3.6           | 0.0           | 0.0           | 0.2           | -0.2          | -0.1                    | 0.1           | <b>3152.5</b> | 0.1           | 0.4           | 0.3           | 0.0              | 12.7              | -5.1               | 0.2     |
| x'x'               | 0.0               | 0.0           | 0.5           | -5.7          | -0.1          | -0.2          | -0.5                    | -0.2          | 0.1           | <b>3248.2</b> | 0.0           | 0.0           | 25.9             | 0.0               | -0.2               | 0.3     |
| x'x                | 0.0               | 0.1           | -0.2          | 0.1           | -5.8          | -1.2          | 0.0                     | -0.5          | 0.4           | 0.0           | <b>3252.2</b> | 0.0           | 0.0              | 3.7               | -19.2              | 0.1     |
| xx                 | 0.1               | 0.0           | -0.1          | -0.2          | -1.2          | 5.7           | 0.0                     | 0.2           | 0.3           | 0.0           | 0.0           | <b>3252.9</b> | 0.0              | 19.2              | 3.7                | 0.1     |
| $S_{\text{sym}}$   | 0.2               | 0.0           | -0.5          | 5.8           | 0.1           | 0.3           | -48.1                   | -0.2          | 0.0           | 25.9          | 0.0           | 0.0           | <b>3227.3</b>    | 0.1               | -0.5               | 58.1    |
| $S_{\text{asym}}$  | 45.3              | 26.7          | 1.3           | 1.9           | 18.8          | -44.3         | 0.0                     | 5.7           | 12.7          | 0.0           | 3.7           | 19.2          | 0.1              | <b>3302.6</b>     | 0.0                | 131.7   |
| $S'_{\text{asym}}$ | 26.7              | -44.8         | -1.7          | 1.2           | -43.8         | -18.8         | 0.2                     | 12.3          | -5.1          | -0.2          | -19.2         | 3.7           | -0.5             | 0.0               | <b>3302.6</b>      | 131.6   |



Table S6. (continued)

(b) MA-H<sup>+</sup>...H<sub>2</sub>O

|                     | Bending overtones |               |               |               |               |               |               |               |               |               |               |               | Stretching fundamentals |                    |                     | Original |
|---------------------|-------------------|---------------|---------------|---------------|---------------|---------------|---------------|---------------|---------------|---------------|---------------|---------------|-------------------------|--------------------|---------------------|----------|
|                     | wu                | tu            | wx'           | tx'           | wx            | tx            | uu            | ux'           | ux            | x'x'          | x'x           | xx            | S <sub>b</sub>          | S <sub>f,sym</sub> | S <sub>f,asym</sub> |          |
| wu                  | <b>2847.7</b>     | 0.0           | -0.7          | 0.0           | 0.0           | 0.1           | 0.7           | -5.9          | 0.0           | 0.1           | 0.0           | 0.0           | 32.7                    | -35.0              | 0.0                 | 0.0      |
| tu                  | 0.0               | <b>2860.3</b> | 0.0           | -1.3          | 0.0           | 0.0           | 0.0           | 0.0           | 2.9           | 0.0           | 0.1           | 0.0           | 0.0                     | 0.0                | 54.0                | 0.0      |
| wx'                 | -0.7              | 0.0           | <b>2927.1</b> | 0.0           | 0.0           | 0.2           | 0.5           | -0.7          | 0.0           | -7.1          | 0.0           | 0.2           | 24.4                    | -26.1              | 0.0                 | 0.1      |
| tx'                 | 0.0               | -1.3          | 0.0           | <b>2937.8</b> | -0.1          | 0.0           | 0.0           | 0.0           | -0.1          | 0.0           | 2.5           | 0.0           | 0.0                     | 0.0                | -29.0               | 0.0      |
| wx                  | 0.0               | 0.0           | 0.0           | -0.1          | <b>2973.9</b> | 0.0           | 0.0           | 0.0           | -0.3          | 0.0           | -5.2          | 0.0           | 0.0                     | 0.0                | 34.8                | 0.0      |
| tx                  | 0.1               | 0.0           | 0.2           | 0.0           | 0.0           | <b>2985.9</b> | 0.1           | 0.1           | 0.0           | 0.2           | 0.0           | -3.4          | -29.8                   | 20.2               | 0.0                 | 0.0      |
| uu                  | 0.7               | 0.0           | 0.5           | 0.0           | 0.0           | 0.1           | <b>3099.7</b> | 1.0           | 0.0           | -0.5          | 0.0           | -0.4          | 30.5                    | 29.8               | 0.0                 | 0.0      |
| ux'                 | -5.9              | 0.0           | -0.7          | 0.0           | 0.0           | 0.1           | 1.0           | <b>3181.3</b> | 0.0           | -1.5          | 0.0           | 0.3           | -10.1                   | 14.8               | 0.0                 | 0.4      |
| ux                  | 0.0               | 2.9           | 0.0           | -0.1          | -0.3          | 0.0           | 0.0           | 0.0           | <b>3227.6</b> | 0.0           | -0.4          | 0.0           | 0.0                     | 0.0                | 3.8                 | 0.1      |
| x'x'                | 0.1               | 0.0           | -7.1          | 0.0           | 0.0           | 0.2           | -0.5          | -1.5          | 0.0           | <b>3263.6</b> | 0.0           | 0.4           | -0.6                    | -21.2              | 0.0                 | 0.2      |
| x'x                 | 0.0               | 0.1           | 0.0           | 2.5           | -5.2          | 0.0           | 0.0           | 0.0           | -0.4          | 0.0           | <b>3313.3</b> | 0.0           | 0.0                     | 0.0                | 15.7                | 0.0      |
| xx                  | 0.0               | 0.0           | 0.2           | 0.0           | 0.0           | -3.4          | -0.4          | 0.3           | 0.0           | 0.4           | 0.0           | <b>3357.9</b> | -23.6                   | -0.2               | 0.0                 | 0.3      |
| S <sub>b</sub>      | 32.7              | 0.0           | 24.4          | 0.0           | 0.0           | -29.8         | 30.5          | -10.1         | 0.0           | -0.6          | 0.0           | -23.6         | <b>2845.5</b>           | 6.1                | 0.0                 | 1163.7   |
| S <sub>f,sym</sub>  | -35.0             | 0.0           | -26.1         | 0.0           | 0.0           | 20.2          | 29.8          | 14.8          | 0.0           | -21.2         | 0.0           | -0.2          | 6.1                     | <b>3274.1</b>      | 0.0                 | 88.4     |
| S <sub>f,asym</sub> | 0.0               | 54.0          | 0.0           | -29.0         | 34.8          | 0.0           | 0.0           | 0.0           | 3.8           | 0.0           | 15.7          | 0.0           | 0.0                     | 0.0                | <b>3324.7</b>       | 94.8     |

Table S6. (continued)

(c) MA-H<sup>+</sup>...H<sub>2</sub>O...Ar (type 1)

|                     | Bending overtones |               |               |               |               |               |               |               |               |               |               | Stretching fundamentals |                |                    | Original      |                     |
|---------------------|-------------------|---------------|---------------|---------------|---------------|---------------|---------------|---------------|---------------|---------------|---------------|-------------------------|----------------|--------------------|---------------|---------------------|
|                     | wu                | tu            | tx'           | wx'           | wx            | tx            | uu            | ux'           | ux            | x'x'          | xx            | x'x                     | S <sub>b</sub> | S <sub>f,sym</sub> |               | S <sub>f,asym</sub> |
| wu                  | <b>2874.3</b>     | 0.0           | 0.0           | 1.9           | 0.0           | 0.9           | 1.2           | 7.8           | 0.0           | 0.0           | 0.1           | 0.0                     | -29.1          | 28.3               | -0.1          | 0.0                 |
| tu                  | 0.0               | <b>2880.8</b> | 1.7           | 0.0           | -0.1          | 0.0           | 0.0           | 0.0           | 4.8           | 0.0           | 0.0           | -0.2                    | 0.1            | -0.1               | -56.4         | 0.0                 |
| tx'                 | 0.0               | 1.7           | <b>2950.8</b> | 0.0           | -1.6          | 0.0           | 0.0           | 0.0           | -0.2          | -0.1          | 0.0           | -2.8                    | -0.3           | 0.3                | 12.8          | 0.0                 |
| wx'                 | 1.9               | 0.0           | 0.0           | <b>2948.6</b> | 0.0           | 0.7           | 0.5           | 1.6           | 0.0           | -9.4          | -1.7          | 0.0                     | -22.4          | 20.5               | 0.0           | 0.2                 |
| wx                  | 0.0               | -0.1          | -1.6          | 0.0           | <b>2946.3</b> | 0.0           | 0.0           | 0.0           | -0.8          | 0.0           | -0.1          | 7.8                     | -0.3           | 0.3                | -43.1         | 0.0                 |
| tx                  | 0.9               | 0.0           | 0.0           | 0.7           | 0.0           | <b>2950.2</b> | 0.0           | 0.9           | 0.0           | -1.6          | -6.8          | -0.1                    | -37.6          | 31.4               | 0.2           | 0.0                 |
| uu                  | 1.2               | 0.0           | 0.0           | 0.5           | 0.0           | 0.0           | <b>3141.3</b> | 3.2           | 0.0           | -0.6          | -0.1          | 0.0                     | -31.2          | -30.8              | 0.0           | 0.1                 |
| ux'                 | 7.8               | 0.0           | 0.0           | 1.6           | 0.0           | 0.9           | 3.2           | <b>3216.6</b> | 0.0           | -2.8          | -1.0          | 0.0                     | -25.6          | 15.5               | 0.0           | 0.3                 |
| ux                  | 0.0               | 4.8           | -0.2          | 0.0           | -0.8          | 0.0           | 0.0           | 0.0           | <b>3212.5</b> | 0.0           | 0.0           | -2.5                    | 0.1            | 0.0                | -1.0          | 0.1                 |
| x'x'                | 0.0               | 0.0           | -0.1          | -9.4          | 0.0           | -1.6          | -0.6          | -2.8          | 0.0           | <b>3289.2</b> | 3.4           | 0.0                     | 14.3           | 15.2               | 0.0           | 0.3                 |
| xx                  | 0.1               | 0.0           | 0.0           | -1.7          | -0.1          | -6.8          | -0.1          | -1.0          | 0.0           | 3.4           | <b>3288.2</b> | 0.0                     | -8.6           | 2.7                | -0.1          | 0.3                 |
| x'x                 | 0.0               | -0.2          | -2.8          | 0.0           | 7.8           | -0.1          | 0.0           | 0.0           | -2.5          | 0.0           | 0.0           | <b>3291.7</b>           | -0.1           | 0.0                | 15.0          | 0.1                 |
| S <sub>b</sub>      | -29.1             | 0.1           | -0.3          | -22.4         | -0.3          | -37.6         | -31.2         | -25.6         | 0.1           | 14.3          | -8.6          | -0.1                    | <b>2831.7</b>  | 6.0                | 0.0           | 1158.2              |
| S <sub>f,sym</sub>  | 28.3              | -0.1          | 0.3           | 20.5          | 0.3           | 31.4          | -30.8         | 15.5          | 0.0           | 15.2          | 2.7           | 0.0                     | 6.0            | <b>3274.3</b>      | 0.0           | 90.1                |
| S <sub>f,asym</sub> | -0.1              | -56.4         | 12.8          | 0.0           | -43.1         | 0.2           | 0.0           | 0.0           | -1.0          | 0.0           | -0.1          | 15.0                    | 0.0            | 0.0                | <b>3326.9</b> | 95.3                |

Table S6. (continued)

(d) Ar...MA-H<sup>+</sup>...H<sub>2</sub>O (type 2)

|                     | Bending overtones |               |               |               |               |               |               |               |               |               |               |               | Stretching fundamentals |                    |                     | Original |
|---------------------|-------------------|---------------|---------------|---------------|---------------|---------------|---------------|---------------|---------------|---------------|---------------|---------------|-------------------------|--------------------|---------------------|----------|
|                     | wu                | tu            | wx'           | tx'           | wx            | tx            | uu            | ux'           | ux            | x'x'          | xx'           | xx            | S <sub>b</sub>          | S <sub>f,sym</sub> | S <sub>f,asym</sub> |          |
| wu                  | <b>2851.7</b>     | 0.7           | -0.5          | 0.2           | 0.3           | 0.0           | -0.7          | 5.8           | -1.4          | -0.1          | 0.0           | 0.1           | 33.1                    | -34.2              | 11.3                | 0.0      |
| tu                  | 0.7               | <b>2863.2</b> | -0.2          | 0.9           | -0.2          | -0.1          | 0.4           | -1.3          | -2.9          | 0.0           | -0.1          | 0.0           | -6.2                    | 9.0                | 53.7                | 0.0      |
| wx'                 | -0.5              | -0.2          | <b>2934.0</b> | -0.8          | 0.1           | 0.2           | -0.5          | 0.9           | 0.0           | 6.9           | -1.2          | -0.2          | 24.1                    | -25.6              | -1.5                | 0.1      |
| tx'                 | 0.2               | 0.9           | -0.8          | <b>2943.1</b> | 0.0           | 0.1           | -0.1          | 0.3           | -0.1          | 1.7           | 2.4           | 0.0           | 3.1                     | -2.1               | 29.3                | 0.0      |
| wx                  | 0.3               | -0.2          | 0.1           | 0.0           | <b>2977.1</b> | 0.7           | -0.1          | 0.0           | -0.3          | 0.0           | -5.2          | 1.8           | -1.3                    | -1.6               | -35.1               | 0.0      |
| tx                  | 0.0               | -0.1          | 0.2           | 0.1           | 0.7           | <b>2988.1</b> | -0.1          | -0.2          | 0.3           | -0.2          | 1.2           | 3.3           | -30.6                   | 21.2               | 3.6                 | 0.0      |
| uu                  | -0.7              | 0.4           | -0.5          | -0.1          | -0.1          | -0.1          | <b>3100.7</b> | 0.6           | 0.2           | -0.5          | 0.0           | -0.4          | -30.5                   | -30.3              | 0.8                 | 0.0      |
| ux'                 | 5.8               | -1.3          | 0.9           | 0.3           | 0.0           | -0.2          | 0.6           | <b>3183.6</b> | 0.0           | -1.1          | 0.0           | 0.4           | 10.5                    | -14.3              | -0.2                | 0.5      |
| ux                  | -1.4              | -2.9          | 0.0           | -0.1          | -0.3          | 0.3           | 0.2           | 0.0           | <b>3227.8</b> | 0.1           | -0.1          | -0.2          | -1.7                    | 0.6                | -4.2                | 0.2      |
| x'x'                | -0.1              | 0.0           | 6.9           | 1.7           | 0.0           | -0.2          | -0.5          | -1.1          | 0.1           | <b>3269.4</b> | -0.1          | 0.4           | 0.9                     | 21.0               | -2.4                | 0.2      |
| x'x                 | 0.0               | -0.1          | -1.2          | 2.4           | -5.2          | 1.2           | 0.0           | 0.0           | -0.1          | -0.1          | <b>3315.8</b> | 0.0           | 1.9                     | -2.7               | -15.8               | 0.0      |
| xx                  | 0.1               | 0.0           | -0.2          | 0.0           | 1.8           | 3.3           | -0.4          | 0.4           | -0.2          | 0.4           | 0.0           | <b>3357.6</b> | 23.5                    | 0.5                | 1.8                 | 0.2      |
| S <sub>b</sub>      | 33.1              | -6.2          | 24.1          | 3.1           | -1.3          | -30.6         | -30.5         | 10.5          | -1.7          | 0.9           | 1.9           | 23.5          | <b>2870.7</b>           | 6.1                | -0.3                | 1122.3   |
| S <sub>f,sym</sub>  | -34.2             | 9.0           | -25.6         | -2.1          | -1.6          | 21.2          | -30.3         | -14.3         | 0.6           | 21.0          | -2.7          | 0.5           | 6.1                     | <b>3274.0</b>      | -0.8                | 144.0    |
| S <sub>f,asym</sub> | 11.3              | 53.7          | -1.5          | 29.3          | -35.1         | 3.6           | 0.8           | -0.2          | -4.2          | -2.4          | -15.8         | 1.8           | -0.3                    | -0.8               | <b>3324.0</b>       | 165.8    |

<sup>a</sup> Notations for NH vibrational modes: t: twisting, w: wagging, u: umbrella, x: scissoring, S<sub>b</sub>: H-bonded stretching, S<sub>f,sym</sub>: symmetric free stretching, S<sub>f,asym</sub>: asymmetric free stretching; see Fig. 7.

**Table S7.** Hamiltonian matrix elements (in  $\text{cm}^{-1}$ ) between NH bending overtones and stretching fundamentals involved in Fermi resonance and original IR intensities of vibrational quantum states (in  $\text{km/mol}$ ) in  $\text{NH}_4^+$  ion and clusters.<sup>a</sup>

**(a)  $\text{NH}_4^+$**

|                     | Bending overtones             |               |               |               |               |               |                         |               |               |               |               |               | Stretching fundamentals |               |               |                  | Original<br>IR int. |                   |                    |                     |               |               |       |
|---------------------|-------------------------------|---------------|---------------|---------------|---------------|---------------|-------------------------|---------------|---------------|---------------|---------------|---------------|-------------------------|---------------|---------------|------------------|---------------------|-------------------|--------------------|---------------------|---------------|---------------|-------|
|                     | uu/uu'/uu''/u'u''/u'u'/u''u'' |               |               |               |               |               | ux/ut/u't/u'x/u''t/u''x |               |               |               |               |               | xx/xt/tt                |               |               | S <sub>sym</sub> |                     | S <sub>asym</sub> | S' <sub>asym</sub> | S'' <sub>asym</sub> |               |               |       |
| uu/                 | <b>2875.0</b>                 | 0.0           | 0.0           | 0.0           | 0.0           | 0.0           | 0.0                     | 0.0           | 0.0           | 0.0           | 0.0           | 0.0           | 0.0                     | 0.0           | 0.0           | 1.1              | 0.0                 | 0.0               | 69.7               | -0.3                | 0.1           | 0.0           | 0.0   |
| uu'/                | 0.0                           | <b>2877.0</b> | 0.0           | 0.0           | 0.0           | 0.0           | 0.3                     | -0.7          | -0.7          | -1.0          | -1.4          | -1.4          | 0.0                     | 0.0           | 0.0           | 0.0              | 0.0                 | 0.0               | -0.1               | -19.4               | -15.2         | 45.2          | 0.0   |
| uu''/               | 0.0                           | 0.0           | <b>2877.0</b> | 0.0           | 0.0           | 0.0           | -0.5                    | -0.7          | -1.0          | 1.2           | 0.8           | -0.9          | 0.0                     | 0.0           | 0.0           | 0.0              | 0.0                 | 0.0               | 0.2                | 7.8                 | -49.2         | -13.2         | 0.0   |
| u'u''/              | 0.0                           | 0.0           | 0.0           | <b>2877.0</b> | 0.0           | 0.0           | -1.8                    | 0.7           | -0.5          | -1.0          | 0.3           | -0.4          | 0.0                     | 0.0           | 0.0           | 0.0              | 0.0                 | 0.0               | -0.4               | -47.1               | -1.9          | -20.9         | 0.0   |
| u'u'/               | 0.0                           | 0.0           | 0.0           | 0.0           | <b>2878.0</b> | 0.0           | 0.0                     | 0.0           | 0.0           | 0.0           | 0.0           | 0.0           | 0.0                     | 0.0           | 0.0           | 0.0              | 1.7                 | -0.2              | 0.0                | -0.1                | -0.4          | -1.0          | 0.0   |
| u''u''              | 0.0                           | 0.0           | 0.0           | 0.0           | 0.0           | <b>2878.0</b> | 0.1                     | 0.0           | 0.0           | 0.0           | 0.0           | 0.0           | 0.0                     | 0.0           | 0.0           | 0.0              | -0.2                | -1.6              | -0.2               | 0.6                 | 1.0           | 0.7           | 0.0   |
| ux/                 | 0.0                           | 0.3           | -0.5          | -1.8          | 0.0           | 0.1           | <b>3108.5</b>           | -0.2          | 0.5           | 0.3           | -0.5          | 0.1           | 0.0                     | 0.0           | 0.0           | 0.0              | 0.0                 | 0.0               | 0.0                | 26.9                | 9.6           | 21.6          | 0.2   |
| ut/                 | 0.0                           | -0.7          | -0.7          | 0.7           | 0.0           | 0.0           | -0.2                    | <b>3107.9</b> | 0.3           | -0.5          | 0.1           | 0.5           | 0.0                     | 0.0           | 0.0           | 0.0              | 0.0                 | 0.0               | 0.0                | -8.7                | 19.8          | -11.7         | 0.1   |
| u't/                | 0.0                           | -0.7          | -1.0          | -0.5          | 0.0           | 0.0           | 0.5                     | 0.3           | <b>3107.9</b> | -0.1          | 0.0           | 0.5           | 0.0                     | 0.0           | 0.0           | 0.0              | 0.0                 | 0.0               | 0.0                | 10.9                | 21.1          | -1.0          | 0.1   |
| u'x/                | 0.0                           | -1.0          | 1.2           | -1.0          | 0.0           | 0.0           | 0.3                     | -0.5          | -0.1          | <b>3108.5</b> | 0.5           | 0.0           | 0.0                     | 0.0           | 0.0           | 0.0              | 0.0                 | 0.0               | 0.0                | 28.7                | -18.5         | -12.0         | 0.2   |
| u''t/               | 0.0                           | -1.4          | 0.8           | 0.3           | 0.0           | 0.0           | -0.5                    | 0.1           | 0.0           | 0.5           | <b>3108.2</b> | 0.3           | 0.0                     | 0.0           | 0.0           | 0.0              | 0.0                 | 0.0               | 0.0                | 5.5                 | -6.1          | -30.1         | 0.2   |
| u''x/               | 0.0                           | -1.4          | -0.9          | -0.4          | 0.0           | 0.0           | 0.1                     | 0.5           | 0.5           | 0.0           | 0.3           | <b>3108.2</b> | 0.0                     | 0.0           | 0.0           | 0.0              | 0.0                 | 0.0               | 0.0                | 10.4                | 23.9          | -15.0         | 0.2   |
| xx/                 | 1.1                           | 0.0           | 0.0           | 0.0           | 0.0           | 0.0           | 0.0                     | 0.0           | 0.0           | 0.0           | 0.0           | 0.0           | <b>3339.5</b>           | 0.0           | 0.0           | -14.1            | 0.0                 | 0.0               | 0.0                | 0.0                 | 0.0           | 0.0           | 0.0   |
| xt/                 | 0.0                           | 0.0           | 0.0           | 0.0           | 1.7           | -0.2          | 0.0                     | 0.0           | 0.0           | 0.0           | 0.0           | 0.0           | 0.0                     | <b>3343.6</b> | 0.0           | 0.0              | 0.0                 | 0.0               | 0.0                | 0.0                 | 0.0           | 0.0           | 0.0   |
| tt                  | 0.0                           | 0.0           | 0.0           | 0.0           | -0.2          | -1.6          | 0.0                     | 0.0           | 0.0           | 0.0           | 0.0           | 0.0           | 0.0                     | 0.0           | <b>3344.1</b> | 0.4              | 0.0                 | 0.0               | 0.0                | 0.0                 | 0.0           | 0.0           | 0.0   |
| S <sub>sym</sub>    | 69.7                          | -0.1          | 0.2           | -0.4          | 0.0           | -0.2          | 0.0                     | 0.0           | 0.0           | 0.0           | 0.0           | 0.0           | -14.1                   | 0.0           | 0.4           | <b>3209.3</b>    | 0.0                 | 0.0               | 0.0                | 0.0                 | 0.0           | 0.0           | 0.0   |
| S <sub>asym</sub>   | -0.3                          | -19.4         | 7.8           | -47.1         | -0.1          | 0.6           | 26.9                    | -8.7          | 10.9          | 28.7          | 5.5           | 10.4          | 0.0                     | 0.0           | 0.0           | 0.0              | 0.0                 | 0.0               | 0.0                | <b>3320.9</b>       | 0.0           | 0.0           | 200.9 |
| S' <sub>asym</sub>  | 0.1                           | -15.2         | -49.2         | -1.9          | -0.4          | 1.0           | 9.6                     | 19.8          | 21.1          | -18.5         | -6.1          | 23.9          | 0.0                     | 0.0           | 0.0           | 0.0              | 0.0                 | 0.0               | 0.0                | 0.0                 | <b>3320.9</b> | 0.0           | 201.0 |
| S'' <sub>asym</sub> | 0.0                           | 45.2          | -13.2         | -20.9         | -1.0          | 0.7           | 21.6                    | -11.7         | -1.0          | -12.0         | -30.1         | -15.0         | 0.0                     | 0.0           | 0.0           | 0.0              | 0.0                 | 0.0               | 0.0                | 0.0                 | 0.0           | <b>3321.0</b> | 201.0 |

Table S7. (continued)

(b) NH<sub>4</sub><sup>+</sup>...H<sub>2</sub>O

|                      | Bending overtones |               |               |               |               |               | Stretching fundamentals |               |               |               |               |               |               |               |               | Original<br>IR int. |                |                    |                     |                      |
|----------------------|-------------------|---------------|---------------|---------------|---------------|---------------|-------------------------|---------------|---------------|---------------|---------------|---------------|---------------|---------------|---------------|---------------------|----------------|--------------------|---------------------|----------------------|
|                      | uu                | uu'           | uu''          | u'u'          | u'u''         | u''u''        | ux                      | ut            | u'x           | u't           | u''x          | u''t          | xx            | xt            | tt            |                     | S <sub>b</sub> | S <sub>f,sym</sub> | S <sub>f,asym</sub> | S' <sub>f,asym</sub> |
| uu                   | <b>2793.0</b>     | 0.1           | 0.0           | -0.3          | 0.0           | -0.3          | 0.0                     | 0.0           | 1.3           | 0.0           | 0.0           | -1.3          | -0.3          | 0.0           | -0.5          | 21.9                | -62.4          | 0.0                | 0.7                 | 0.3                  |
| uu'                  | 0.1               | <b>2866.2</b> | 0.0           | 0.0           | 0.0           | -0.1          | -0.3                    | 0.0           | -0.4          | 0.0           | 0.0           | -0.4          | 0.9           | 0.0           | -0.9          | 1.1                 | -0.7           | 0.0                | -24.7               | 0.0                  |
| uu''                 | 0.0               | 0.0           | <b>2893.2</b> | 0.0           | -0.2          | 0.0           | 0.0                     | 5.0           | 0.0           | -0.3          | 0.0           | 0.0           | 0.0           | -0.8          | 0.0           | 0.0                 | 0.0            | -17.2              | 0.0                 | 0.0                  |
| u'u'                 | -0.3              | 0.0           | 0.0           | <b>2941.7</b> | 0.0           | 0.5           | -0.8                    | 0.0           | -1.4          | 0.0           | 0.0           | -0.8          | 0.9           | 0.0           | 1.1           | 30.5                | 20.5           | 0.0                | -27.2               | 0.0                  |
| u'u''                | 0.0               | 0.0           | -0.2          | 0.0           | <b>2969.8</b> | 0.0           | 0.0                     | -1.0          | 0.0           | -3.9          | -1.4          | 0.0           | 0.0           | 0.1           | 0.0           | 0.0                 | 0.0            | 42.0               | 0.0                 | 0.0                  |
| u''u''               | -0.3              | -0.1          | 0.0           | 0.5           | 0.0           | <b>2996.9</b> | 1.0                     | 0.0           | 0.8           | 0.0           | 0.0           | -6.3          | 1.1           | 0.0           | 0.6           | 31.9                | 20.2           | 0.0                | 31.5                | 0.0                  |
| ux                   | 0.0               | -0.3          | 0.0           | -0.8          | 0.0           | 1.0           | <b>3075.4</b>           | 0.0           | 0.9           | 0.0           | 0.0           | 0.4           | -0.4          | 0.0           | 0.2           | 0.0                 | 0.1            | 0.0                | 31.8                | 0.1                  |
| ut                   | 0.0               | 0.0           | 5.0           | 0.0           | -1.0          | 0.0           | 0.0                     | <b>3100.8</b> | 0.0           | -0.6          | 0.4           | 0.0           | 0.0           | -0.2          | 0.0           | 0.0                 | 0.0            | -31.9              | 0.0                 | 0.1                  |
| u'x                  | 1.3               | -0.4          | 0.0           | -1.4          | 0.0           | 0.8           | 0.9                     | 0.0           | <b>3149.9</b> | 0.0           | 0.0           | 0.7           | 1.8           | 0.0           | 0.1           | 13.0                | -17.5          | 0.0                | 20.2                | 0.5                  |
| u't                  | 0.0               | 0.0           | -0.3          | 0.0           | -3.9          | 0.0           | 0.0                     | -0.6          | 0.0           | <b>3175.8</b> | 0.7           | 0.0           | 0.0           | -1.0          | 0.0           | 0.0                 | 0.0            | 14.6               | 0.0                 | 0.1                  |
| u''x                 | 0.0               | 0.0           | 0.0           | 0.0           | -1.4          | 0.0           | 0.0                     | 0.4           | 0.0           | 0.7           | <b>3178.3</b> | 0.0           | 0.0           | -3.8          | 0.0           | 0.0                 | 0.0            | -17.6              | 0.0                 | 0.0                  |
| u''t                 | -1.3              | -0.4          | 0.0           | -0.8          | 0.0           | -6.3          | 0.4                     | 0.0           | 0.7           | 0.0           | 0.0           | <b>3203.5</b> | 0.2           | 0.0           | 5.3           | -25.5               | 18.0           | 0.0                | 14.1                | 0.2                  |
| xx                   | -0.3              | 0.9           | 0.0           | 0.9           | 0.0           | 1.1           | -0.4                    | 0.0           | 1.8           | 0.0           | 0.0           | 0.2           | <b>3361.7</b> | 0.0           | 0.4           | 0.7                 | -8.9           | 0.0                | 0.3                 | 0.1                  |
| xt                   | 0.0               | 0.0           | -0.8          | 0.0           | 0.1           | 0.0           | 0.0                     | -0.2          | 0.0           | -1.0          | -3.8          | 0.0           | 0.0           | <b>3389.0</b> | 0.0           | 0.0                 | 0.0            | 0.8                | 0.0                 | 0.0                  |
| tt                   | -0.5              | -0.9          | 0.0           | 1.1           | 0.0           | 0.6           | 0.2                     | 0.0           | 0.1           | 0.0           | 0.0           | 5.3           | 0.4           | 0.0           | <b>3412.1</b> | -7.4                | -4.5           | 0.0                | 0.7                 | 0.0                  |
| S <sub>b</sub>       | 21.9              | 1.1           | 0.0           | 30.5          | 0.0           | 31.9          | 0.0                     | 0.0           | 13.0          | 0.0           | 0.0           | -25.5         | 0.7           | 0.0           | -7.4          | <b>2659.5</b>       | 10.9           | 0.0                | 0.0                 | 1528.8               |
| S <sub>f,sym</sub>   | -62.4             | -0.7          | 0.0           | 20.5          | 0.0           | 20.2          | 0.1                     | 0.0           | -17.5         | 0.0           | 0.0           | 18.0          | -8.9          | 0.0           | -4.5          | 10.9                | <b>3264.2</b>  | 0.0                | 0.0                 | 91.2                 |
| S <sub>f,asym</sub>  | 0.0               | 0.0           | -17.2         | 0.0           | 42.0          | 0.0           | 0.0                     | -31.9         | 0.0           | 14.6          | -17.6         | 0.0           | 0.0           | 0.8           | 0.0           | 0.0                 | 0.0            | <b>3352.2</b>      | 0.0                 | 145.4                |
| S' <sub>f,asym</sub> | 0.7               | -24.7         | 0.0           | -27.2         | 0.0           | 31.5          | 31.8                    | 0.0           | 20.2          | 0.0           | 0.0           | 14.1          | 0.3           | 0.0           | 0.7           | 0.0                 | 0.0            | 0.0                | <b>3353.2</b>       | 142.2                |

Table S7. (continued)

(c) NH<sub>4</sub><sup>+</sup>...H<sub>2</sub>O...Ar (type 1)

|                      | Bending overtones |               |               |               |               |               | Stretching fundamentals |               |               |               |               |               |               |               |               | Original<br>IR int. |                |                    |                     |                      |
|----------------------|-------------------|---------------|---------------|---------------|---------------|---------------|-------------------------|---------------|---------------|---------------|---------------|---------------|---------------|---------------|---------------|---------------------|----------------|--------------------|---------------------|----------------------|
|                      | uu                | uu'           | uu''          | u'u'          | u'u''         | u''u''        | ut                      | ux            | u't           | u'x           | u''t          | u''x          | tt            | tx            | xx            |                     | S <sub>b</sub> | S <sub>f,sym</sub> | S <sub>f,asym</sub> | S' <sub>f,asym</sub> |
| uu                   | <b>2786.5</b>     | -0.1          | 0.0           | -0.3          | 0.0           | -0.3          | 0.0                     | 0.1           | -1.3          | 0.0           | 0.0           | 1.3           | 0.3           | 0.0           | 0.5           | -23.1               | -62.6          | -0.4               | -0.3                | 0.4                  |
| uu'                  | -0.1              | <b>2864.0</b> | 0.1           | 0.0           | 0.2           | 0.1           | 0.2                     | 0.0           | -0.2          | -0.3          | 0.3           | -0.2          | 0.4           | 0.8           | -0.4          | 0.5                 | 0.3            | -0.6               | -24.3               | 0.0                  |
| uu''                 | 0.0               | 0.1           | <b>2892.1</b> | 0.0           | 0.1           | -0.1          | 0.0                     | -5.2          | 0.2           | -0.1          | 0.0           | 0.1           | -0.7          | 0.4           | 0.7           | -0.7                | -0.3           | 17.0               | -0.2                | 0.0                  |
| u'u'                 | -0.3              | 0.0           | 0.0           | <b>2943.5</b> | 0.0           | 0.5           | -0.4                    | -0.6          | 1.6           | 0.0           | 0.0           | 0.8           | -0.9          | 0.0           | -1.1          | -29.4               | 20.7           | 24.5               | 12.3                | 0.0                  |
| u'u''                | 0.0               | 0.2           | 0.1           | 0.0           | <b>2973.2</b> | 0.0           | 1.0                     | -0.5          | -0.1          | 4.0           | 1.5           | 0.0           | 0.0           | 0.1           | 0.0           | 0.0                 | 0.0            | 19.0               | -37.2               | 0.0                  |
| u''u''               | -0.3              | 0.1           | -0.1          | 0.5           | 0.0           | <b>3001.8</b> | 0.5                     | 0.8           | -0.7          | 0.0           | 0.0           | 6.5           | -1.1          | 0.0           | -0.6          | -31.2               | 20.5           | -28.0              | -14.3               | 0.0                  |
| ut                   | 0.0               | 0.2           | 0.0           | -0.4          | 1.0           | 0.5           | <b>3071.6</b>           | 0.0           | -0.5          | -0.3          | 0.7           | -0.2          | 0.2           | 0.3           | -0.1          | 0.0                 | 0.0            | -0.6               | -31.7               | 0.1                  |
| ux                   | 0.1               | 0.0           | -5.2          | -0.6          | -0.5          | 0.8           | 0.0                     | <b>3098.7</b> | -0.3          | 0.2           | -0.2          | -0.6          | 0.2           | -0.1          | -0.3          | 0.0                 | -0.1           | -32.2              | 0.3                 | 0.1                  |
| u't                  | -1.3              | -0.2          | 0.2           | 1.6           | -0.1          | -0.7          | -0.5                    | -0.3          | <b>3150.4</b> | 0.0           | 0.0           | 0.6           | 1.8           | 0.1           | 0.1           | 11.8                | 17.4           | 17.2               | 9.1                 | 0.6                  |
| u'x                  | 0.0               | -0.3          | -0.1          | 0.0           | 4.0           | 0.0           | -0.3                    | 0.2           | 0.0           | <b>3178.2</b> | 0.6           | 0.1           | 0.0           | 1.1           | 0.1           | 0.1                 | 0.0            | -6.4               | 13.1                | 0.1                  |
| u''t                 | 0.0               | 0.3           | 0.0           | 0.0           | 1.5           | 0.0           | 0.7                     | -0.2          | 0.0           | 0.6           | <b>3180.1</b> | -0.1          | -0.1          | 3.9           | 0.0           | 0.0                 | 0.1            | 7.9                | -16.5               | 0.0                  |
| u''x                 | 1.3               | -0.2          | 0.1           | 0.8           | 0.0           | 6.5           | -0.2                    | -0.6          | 0.6           | 0.1           | -0.1          | <b>3206.8</b> | 0.2           | -0.1          | 5.4           | -25.1               | -17.7          | 12.5               | 6.2                 | 0.3                  |
| tt                   | 0.3               | 0.4           | -0.7          | -0.9          | 0.0           | -1.1          | 0.2                     | 0.2           | 1.8           | 0.0           | -0.1          | 0.2           | <b>3360.5</b> | 0.0           | 0.4           | 1.5                 | 9.1            | 0.2                | 0.2                 | 0.1                  |
| tx                   | 0.0               | 0.8           | 0.4           | 0.0           | 0.1           | 0.0           | 0.3                     | -0.1          | 0.1           | 1.1           | 3.9           | -0.1          | 0.0           | <b>3389.4</b> | 0.0           | 0.0                 | -0.1           | 0.4                | -0.4                | 0.0                  |
| xx                   | 0.5               | -0.4          | 0.7           | -1.1          | 0.0           | -0.6          | -0.1                    | -0.3          | 0.1           | 0.1           | 0.0           | 5.4           | 0.4           | 0.0           | <b>3414.7</b> | -7.2                | 4.4            | 0.9                | 0.3                 | 0.1                  |
| S <sub>b</sub>       | -23.1             | 0.5           | -0.7          | -29.4         | 0.0           | -31.2         | 0.0                     | 0.0           | 11.8          | 0.1           | 0.0           | -25.1         | 1.5           | 0.0           | -7.2          | <b>2612.7</b>       | -11.0          | 0.0                | 0.0                 | 1614.3               |
| S <sub>f,sym</sub>   | -62.6             | 0.3           | -0.3          | 20.7          | 0.0           | 20.5          | 0.0                     | -0.1          | 17.4          | 0.0           | 0.1           | -17.7         | 9.1           | -0.1          | 4.4           | -11.0               | <b>3265.1</b>  | 0.4                | 0.0                 | 86.1                 |
| S <sub>f,asym</sub>  | -0.4              | -0.6          | 17.0          | 24.5          | 19.0          | -28.0         | -0.6                    | -32.2         | 17.2          | -6.4          | 7.9           | 12.5          | 0.2           | 0.4           | 0.9           | 0.0                 | 0.4            | <b>3354.0</b>      | 0.0                 | 139.0                |
| S' <sub>f,asym</sub> | -0.3              | -24.3         | -0.2          | 12.3          | -37.2         | -14.3         | -31.7                   | 0.3           | 9.1           | 13.1          | -16.5         | 6.2           | 0.2           | -0.4          | 0.3           | 0.0                 | 0.0            | 0.0                | <b>3354.9</b>       | 141.8                |

Table S7. (continued)

(d) Ar...NH<sub>4</sub><sup>+</sup>...H<sub>2</sub>O (type 2)

|                      | Bending overtones |               |               |               |               |               | Stretching fundamentals |               |               |               |               |               |               |               |               | Original<br>IR int. |                |                    |                     |                      |     |
|----------------------|-------------------|---------------|---------------|---------------|---------------|---------------|-------------------------|---------------|---------------|---------------|---------------|---------------|---------------|---------------|---------------|---------------------|----------------|--------------------|---------------------|----------------------|-----|
|                      | uu                | uu'           | uu''          | u'u'          | u'u''         | u''u''        | ut                      | ux            | u't           | u'x           | u''t          | u''x          | tt            | tx            | xx            |                     | S <sub>b</sub> | S <sub>f,sym</sub> | S <sub>f,asym</sub> | S' <sub>f,asym</sub> |     |
| uu                   | <b>2804.6</b>     | 0.0           | 0.2           | -0.3          | 0.0           | -0.3          | 0.0                     | -0.7          | -1.3          | 0.0           | 0.0           | 1.3           | -0.4          | 0.0           | -0.6          | 21.1                | 61.3           | 7.6                | 0.0                 | 0.4                  |     |
| uu'                  | 0.0               | <b>2876.5</b> | 0.0           | 0.0           | 0.0           | 0.0           | 0.3                     | 0.0           | 0.0           | -0.9          | 0.4           | 0.0           | 0.0           | -0.8          | 0.0           | 0.0                 | 0.0            | 0.0                | -24.1               | 0.0                  |     |
| uu''                 | 0.2               | 0.0           | <b>2894.1</b> | 0.0           | 0.0           | -0.4          | 0.0                     | -4.6          | 0.4           | 0.0           | 0.0           | -0.5          | 0.8           | 0.0           | -0.7          | -1.7                | -3.8           | 18.7               | 0.0                 | 0.1                  |     |
| u'u'                 | -0.3              | 0.0           | 0.0           | <b>2949.8</b> | 0.0           | 0.7           | 0.0                     | -0.6          | 1.2           | 0.0           | 0.0           | 1.0           | 1.0           | 0.0           | 1.2           | 31.5                | -23.8          | 24.6               | 0.0                 | 0.0                  |     |
| u'u''                | 0.0               | 0.0           | 0.0           | 0.0           | <b>2969.2</b> | 0.0           | 1.2                     | 0.0           | 0.0           | 3.4           | 1.2           | 0.0           | 0.0           | 0.0           | 0.0           | 0.0                 | 0.0            | 0.0                | -41.5               | 0.0                  |     |
| u''u''               | -0.3              | 0.0           | -0.4          | 0.7           | 0.0           | <b>2987.6</b> | 0.0                     | 1.0           | -0.8          | 0.0           | 0.0           | 5.7           | 1.1           | 0.0           | 0.5           | 32.4                | -15.2          | -34.4              | 0.0                 | 0.0                  |     |
| ut                   | 0.0               | 0.3           | 0.0           | 0.0           | 1.2           | 0.0           | <b>3087.1</b>           | 0.0           | 0.0           | -0.3          | 0.9           | 0.0           | 0.0           | -0.9          | 0.0           | 0.0                 | 0.0            | 0.0                | 0.0                 | -31.0                | 0.1 |
| ux                   | -0.7              | 0.0           | -4.6          | -0.6          | 0.0           | 1.0           | 0.0                     | <b>3109.5</b> | -0.3          | 0.0           | 0.0           | -0.5          | -0.3          | 0.0           | -0.8          | 1.5                 | 4.8            | -31.7              | 0.0                 | 0.1                  |     |
| u't                  | -1.3              | 0.0           | 0.4           | 1.2           | 0.0           | -0.8          | 0.0                     | -0.3          | <b>3159.8</b> | 0.0           | 0.0           | 0.5           | -1.3          | 0.0           | -0.1          | -13.7               | -19.6          | 17.1               | 0.0                 | 0.6                  |     |
| u'x                  | 0.0               | -0.9          | 0.0           | 0.0           | 3.4           | 0.0           | -0.3                    | 0.0           | 0.0           | <b>3183.1</b> | 0.5           | 0.0           | 0.0           | -0.8          | 0.0           | 0.0                 | 0.0            | 0.0                | 14.6                | 0.1                  |     |
| u''t                 | 0.0               | 0.4           | 0.0           | 0.0           | 1.2           | 0.0           | 0.9                     | 0.0           | 0.0           | 0.5           | <b>3179.1</b> | 0.0           | 0.0           | -3.2          | 0.0           | 0.0                 | 0.0            | 0.0                | 0.0                 | -18.0                | 0.0 |
| u''x                 | 1.3               | 0.0           | -0.5          | 1.0           | 0.0           | 5.7           | 0.0                     | -0.5          | 0.5           | 0.0           | 0.0           | <b>3201.4</b> | -0.2          | 0.0           | -4.6          | 25.9                | 16.2           | 17.5               | 0.0                 | 0.3                  |     |
| tt                   | -0.4              | 0.0           | 0.8           | 1.0           | 0.0           | 1.1           | 0.0                     | -0.3          | -1.3          | 0.0           | 0.0           | -0.2          | <b>3372.2</b> | 0.0           | 0.4           | 0.2                 | 8.8            | 0.6                | 0.0                 | 0.1                  |     |
| tx                   | 0.0               | -0.8          | 0.0           | 0.0           | 0.0           | 0.0           | -0.9                    | 0.0           | 0.0           | -0.8          | -3.2          | 0.0           | 0.0           | <b>3397.2</b> | 0.0           | 0.0                 | 0.0            | 0.0                | 0.4                 | 0.0                  |     |
| xx                   | -0.6              | 0.0           | -0.7          | 1.2           | 0.0           | 0.5           | 0.0                     | -0.8          | -0.1          | 0.0           | 0.0           | -4.6          | 0.4           | 0.0           | <b>3418.1</b> | -7.4                | 4.4            | -0.7               | 0.0                 | 0.0                  |     |
| S <sub>b</sub>       | 21.1              | 0.0           | -1.7          | 31.5          | 0.0           | 32.4          | 0.0                     | 1.5           | -13.7         | 0.0           | 0.0           | 25.9          | 0.2           | 0.0           | -7.4          | <b>2699.2</b>       | -10.7          | -1.3               | 0.0                 | 1425.8               |     |
| S <sub>f,sym</sub>   | 61.3              | 0.0           | -3.8          | -23.8         | 0.0           | -15.2         | 0.0                     | 4.8           | -19.6         | 0.0           | 0.0           | 16.2          | 8.8           | 0.0           | 4.4           | -10.7               | <b>3258.5</b>  | 1.9                | 0.0                 | 142.9                |     |
| S <sub>f,asym</sub>  | 7.6               | 0.0           | 18.7          | 24.6          | 0.0           | -34.4         | 0.0                     | -31.7         | 17.1          | 0.0           | 0.0           | 17.5          | 0.6           | 0.0           | -0.7          | -1.3                | 1.9            | <b>3337.4</b>      | 0.0                 | 269.7                |     |
| S' <sub>f,asym</sub> | 0.0               | -24.1         | 0.0           | 0.0           | -41.5         | 0.0           | -31.0                   | 0.0           | 0.0           | 14.6          | -18.0         | 0.0           | 0.0           | 0.4           | 0.0           | 0.0                 | 0.0            | 0.0                | <b>3356.6</b>       | 136.9                |     |

<sup>a</sup> Notations for NH vibrational modes: u: umbrella, x: scissoring, t: twisting, s<sub>b</sub>: H-bonded stretching, s<sub>f,sym</sub>: symmetric free stretching, s<sub>f,asym</sub>: asymmetric free stretching; see **Fig. 9**.
